# Supplementary material for: A native prokaryotic voltage-dependent calcium channel with a novel selectivity filter sequence
Source: eLife. 2020 Feb 25;9:e52828. doi: 10.7554/eLife.52828 (PMC7041947; doi:10.7554/eLife.52828)
Supplement: Figure 1—source data 1. [file elife-52828-fig1-data1.fas]

>Bacillus_halodurans
MKMEARQKQNSFTSKMQKIVNHRAFTFTVIALILFNALIVGIETYPRIYADHKWLFYRID
LVLLWIFTIEIAMRFLASNPKSAFFRSSWNWFDFLIVAAGHIFAGAQFVTVLRILRVLRV
LRAISVVPSLRRLVDALVMTIPALGNILILMSIFFYIFAVIGTMLFQHVSPEYFGNLQLS
LLTLFQVVTLESWASGVMRPIFAEVPWSWLYFVSFVLIGTFIIFNLFIGVIVNNVEKAEL
TDNEEDGEADGLKQEISALRKDVAELKSLLKQLK
>Bacillus_licheniformis
MNTHQNRYSVQSKVSALINCRLFQSFITTVIVLNAISIGLETYAFFKPYQKVFFIVDCLF
LTIFVIELSLKLFVQKQHFFKNNWNVFDFVIVAGSLILYNTNFVSVLRIFRVLRVLRTIT
SVPSLRRIVNALFMAIPTISSVIILMSIIFYVYAVIGTMFFSAIAPEYFGNLQLSLLTLF
QTFTLESWASGIFRPIFAESGWSWLYFVSFIVIATFIMINLIVGEIVNNAQKISQEIEDE
TGELKEDTKEIKELRAEVKELKALLQTYITQNEKKD
>Oceanobacillus iheyensis
MRTIQKQCAALANSNIFLNIIIVLIILNAILVGLETYPFFAQFSTFIIWADWTLLTIFTI
EIIIRLIGSHSLKSFFIEPWNVFDFIIVLSSIILAGSSYVMVLRILRVLRVLRAISIIPS
LRKMVNALLLTIPSMGTIMLLLGLFFYVYGVIGTMLFQSVSPEYFGSLHRTLLTLFQVIT
LESWASGVMYPILEKDPTSWWYFVTFILIGAFVIINLFVGVVVNNVEEASREESPSPTNL
KLEKMEQDMEEIKKLLKQQHKD
>Alcanivorax borkumensis
MQATPSSVPANAWRQRLSAWLNSSLFANSITALILLNAIILGVETSSVAQERVGRWLTLV
NQVILFAFTLEIALKLVAFGPRFFRSGWNVFDFLIVAISLTPASGPLAILRSLRILRVLR
LLSSVKRLRMLVESLMQALPGIGWTAALLLMMFYIFAVMGTELFGEAFPQWFGSLGASIY
SLFQIMTLESWSMGIARPVMEVYPLAWIFFVPFILISSFMVLNLFIAIIVSATQEVHESE
QRAEREANNLIAHDERQEMLDLMRAMHAKIAALEAAQQGKAGQ
>Roseobacter_denitrificans
MGVREQLDIWLDNRWVTNLVIAVIIFNAILLGMETSPQIMAEAGDLIIMLDKACLTFFVV
EIFLKLVARGRRFFKSGWNIFDVLIVGAALVPGSQTMSVLRALRILRVLRVISVAPSLRR
VVEGFVTALPGMGSVFVLMAIIFYIGSVISTKLFAASFPQWFGSLPQSGYTLFQIMTLES
WSMGIVRPVMEVYPFAWMFFIPFIMMTTFAVVNLLVGLIVNSMQDAHQQEAGEQTDAYRD
EVLSRLIAIEEKLKDRPRS
>Shewanella_putrefaciens
MSTSLLNAPTGLQARVINLVEQNWFGHFILALILINAVQLGMETSASLMAQYGTLLMSLD
KLLLSVFVVELLLRIYAYRGKFFKDPWSVFDFTVIVIALIPASGPLAVLRSLRVLRVLRV
LTIVPSMKRVVSALLGSLPGLASIATVLLLIYYVFAVIATKIFGDAFPEWFGTIADSFYT
LFQIMTLESWSMGISRPVMEVYPYAWVFFVPFILVATFTMLNLFIAIIVNTMQTFSDEEH
ALEREQDKQILEQEQRQMHEELKAIRLELQQLQTLLRNAAGDSSNVSTKGNIGSD
>Bacillus_pseudofirmus
mennpaeqqvpplvalaqrivfhkaftptiitliiinaiivgletyptvyqgyndwfyaa
dlallwiftieitlrfiaarptksffksswnwfdllivlaghvfagahfvtvlrilrvlr
vlraisvipslrrlvdallmtipalgnimilmgiifyifavigtmlfasvapeyfgnlql
slltlfqvvtleswasgvmrpifaevwwswiyfvifilvgtfivfnlfigvivnnvekan
eeelkselddkeadtkeelaslrnevaemkdlikqmhkqqtkkg
>Caldalkalibacillus_thermarum
MSHIHERHSQLKHPIEAWCDWLVNHPRFTSAIIVLIVINAIVVGMETYPGIYQPYQDWFY
LIDRMILWVFTAEIILKLVATRPRYHFFKDSWNVFDFLIVASGHLFVGAQFVTVLRVLRV
LRLLRAVTVIPSLRRLVSALLYTIPSLGNIMLLMGLIFYIFGVMGTFLFRDVAPEYFGSL
HLSLITLFQVVTLESWASGIMRPIMAEVFWSWIYFVAFILVGTFVIFNLFVGVIVSNVER
AETEDAEQEEGQREERQGLFEGDGSSVSAEEIAKLRQEIKELRQLLKELKDHHSQSST
>Sulfitobacter_sp.
MVGTVNMRERLGRWVEGRAVSNFIIGVIVFNAALLGMETAPALMEKYGTLILFLDRVCLF
IFIAEITLKIIARGVGFFRNGWNVFDFTVVAIALVPAVQGLSVLRALRILRVLRVLSVAP
RLRRVVEGFITALPGMGSVFLLMTIIFYIGSVIATKLFSDQFPEWFGSLPASAYSLFQIM
TLESWSMGIVRPVMEVYPYAWVFFVPFILVTTFAVVNLLVGLIVNSMQDAHNEEETVRTD
AYRLEVMEKLEAIEKKLAEHSRQ
>Arcobacter_butzleri
mylritnivessfftkfiiylivlngitmgletsktfmqsfgvyttlfnqivitiftiei
ilriyvhrisffkdpwslfdffvvaislvptssgfeilrvlrvlrlfrlvtavpqmrkiv
salisvipgmlsvialmtlffyifaimatqlfgerfpewfgtlgesfytlfqvmtlesws
mgivrplmevypyawvffipfifvvtfvminlvvaiivdamailnqkeeqhiidevqshe
dninneiiklreeivelkeliktslkn
>Silicibacter(Ruegeria) pomeroyi
MQRMQAFIDRPGFGRFITAVIMLNAVVLGMETSPYLMERWGGLILAADRICLGIFIVEIA
LKLTAQRQRFFLNGWNLFDFVIVGIALIPAAGGLSVLRALRILRVLRVISVAPRLRRVVE
GFITALPGMASVFLLMTIIFYIGAVIATKLFAASFPDWFGDLGLSAYTLFQIMTLESWSM
GIVRPVMQVYPYAWLFFVPFIMITTFAVVNLLVGLIVNSMQDAHHAEDGERTDAYRDEVL
ARLEQIDQRLNALGETKK
>Paracoccus zeaxanthinifaciens
MSLRARLDALVHGRRAQGVITGVILFNAVLLGLETSGRVMAVAGPLILLLDAACLAVFVA
EIAAKLIARGPRFFRDGWNVFDFSVVAIALMPAGQGLSVLRALRILRLLRLVSVTPRLRR
VVEGLFAAMPGMASVFLLMGVIFYIFSVMATKLFGAGFPDWFGSLGKSAYSLFQVMTLES
WSMGIVRPVMQEYPLAWLFFVPFILITTFAVMNLVVGLIVNSMQDAHQAEESAATDAYRD
EVLMRLRAIEKQLDESGGRGRV
>Magnetococcus sp.
MSRKIRDLIESKRFQNVITAIIVLNGAVLGLLTDTTLSASSQNLLERVDQLCLTIFIVEI
SLKIYAYGVRGFFRSGWNLFDFVIVAIALMPAQGSLSVLRTFRIFRVMRLVSVIPTMRRV
VQGMLLALPGVGSVAALLTVVFYIAAVMATNLYGATFPEWFGDLSKSLYTLFQVMTLESW
SMGIVRPVMNVHPNAWVFFIPFIMLTTFTVLNLFIGIIVDAMAITKEQEEEAKTGHHQEP
ISQTLLHLGDRLDRIEKQLAQNNELLQRQQPQKK
>NsvBa
MQKQSLLIHFSKKIVSHRYFTRIIITLILFNALLVGLETYPALRHEYGSLFHVLDVILLW
IFTLEILTRFLATTPKKDFFKGGWNWFDTIIVLSSHIFVGGHFITVLRILRVLRVLRAIS
VIPSLRRLVDALMLTIPALGNILILMSIIFYIFAVLGTMLFANVAPEYFANLQLSMLTLF
QIVTLDSWGSGVMRPILVDIPWAWTYFIAFVLVGTFIIFNLFIGVIVNNVEKANEDEVKD
KVKEKEEAAQKQMDSLHEELKEIKQYLKSIEKQNRSS
>Meiothermus_ruber
MSASTPNPLGRLVASAAFNRFVTAVIVLAAVLVGLETYPPLMARYGPALHLLNNLVLAIF
ALEVLLRMGALWPRPLRYFLDGWNVFDFLIVVGSLLPGLGAYAVAARLLRLLRVLRLVRT
LPDLQIILGALLRSIPSIGYVLLLMLLLLYVYAVAGVFLFGTNDPFHFGNLHTALLTLFS
ILTLEGWVDVLRIQYFGCERFELPDPALCVQPQAQPLVAVVYMVSFVLLGTLVFLNLLVG
IIVNSMDEMRKSLQERKAPSSDLEARLAEVQAKLREAQALLNNLAGHRG
>Plesiocystis pacifica
MDKVQEFFKKIADAAWFQTSITVVILLAGVLVGIETYPALVERFEHPIHIGDQIILWIFV
AEIVVKMLAEGKKPWRYFLDPWNVFDFVIVAACFLPFEGNAVTVLRLLRLLRVLKLVKAL
PKLQILVGALLKSIPSMVYVSLLLFMLFYVYAVAAVFLFGTNDPLHFENLEIAMLSLFRV
VTLEDWTDVMYINMYGCDRYGYSADSVVQCVTPKAQPLLGALFFVSFVLTGTMIILNLFI
GVIMSGMDEAQAEAADMARMEQADKKPTVVSEVDILVEQVAALSERLAALQRMAKNQQQD
E
>Mariprofundus ferrooxydans PV-1
MFEYFIIGIILLSAVLIGLETSEEMLADYGHWITWGNRLVLGIFIIEAALKIYAVAPRLK
LYFGSGWNLFDFTIIVLALLPSTGELAMLARLARLLRVLRLITAIPELRLIVATLMRSIP
SMGNIMLLMGVIFYIYAVAGQQLFHEHDPVHWRNLGISLLTLFRIVTLEDWTDVMYTAME
MNVYSWIYFVSFVVLGTFVIINLFIAVVINNLEEAKQERLASLRQPPSRDGLIKELEQTQ
AALQKLQKQLQDTRSD
>Coraliomargarita akajimensis DSM 45221
MNDPATPPSDNTWIFKRIVDSTWFTSFIVGVIVFAGILVGVETFPELAAKHAGLIALLNN
IVLAIFTLEVALKITAEKKHPWRYFTDGWNLFDFTIVAVCFLPLGGSYVAVLRLFRLLRV
IRLVTVIPKLQLLVTALLRSLPSMFYVCLLLFLLFYVYAVIGVMLFSGNDPVHFGNLWTS
FLTLFRIVTLEDWTDVMYLQMYGSDIYQGYNLAVAELATTPRAMPVISVVYFVSFVLLGT
MVMLNLVIGVIINGMDDAQKELADRKIHRLLTESSSSNSSREDKVDKLKKQLEAISKELS
ELA
>Nitrosococcus halophilus Nc4
MSVEQTHPPALRQYCRNLVETKAFERFIIAVIVINGVILGLATVPSLEAEYGPYWEIGNQ
IVIAIFVIEAALKIYAVAPHYNRYFGNGWNLFDFFVVVFSLIPATGPFAPIARLARLFRL
MRLISAVPEMRLVVSTLVRSIPSIGHVLLLLAILFYIYAVIGYHLFHEHDPAHWNSLGLS
LLTLFRVVTLEDWTDVMYTAMEEYPLAWIYFVSFVVVGTFVVVNLFIAVVLNNLEAAKRE
HLEELRHPPKAEELLAELRETQATLGRLQERLETVTRAPLEEVKERPVD
>Teredinibacter turnerae T7901
MQANSLNSRFQQIKSNKIFEIFVISIIVFSALVVGAKTYDIPPAVEQAVVVLDWLITVIF
VIEITIRFLAEDRKSRFFRSPWNLFDTLIVLISIIPIENGELAVIGRLVRIFRVLRMVSI
VPELRVLIVSLMKALPQLGYVMLLMFIIYYIYAAIGSTFFEEINPQLWGDVAVSMLTLFR
VMTFEDWTDVMYETMTVYSLSWIYFLSFIFFTAFAFLNMVIGIVVSVMEKEHQALAAANG
EDGSSELAAIRQELSELKALIKSQRGDFS
>Halomonas elongata DSM 2581
MNTQLLTWRDRFERIRANKIFETVVIAIIIVSALLIGAKTYEETSRFHYWLLALDMAVTV
FFLVEILIRMAAEKRLRDFFKQGWNVFDFLIVTASLIPVGESDMVLLARLLRIFRVLRLV
SMIPELRMLMAALVKSIPRMGYVALLMFIIFYIYAAIGSFLFADVDDYLWGNIAVAMLTL
FRIATFEDWTDIMYATQEDFSWSWLYYLTFIFLTAFIFLNMMIGIVLDVMQKESMAIELE
SGEGEAAEIQGLRGDVRELREQVTRLESLLIQQNEASSSRRLTDES
>Tabrizicola_sp._TH137
MTLRERAETFLERPLVTRFIMGVILFNAVLLGLETSKPVMAAAGDVILTLDRICLAIFVA
ELVLKLFALGGRFFRSGWNLFDLAVVGVALMPATGGLSVLRALRVLRVLRVISMAPSLRR
VVEGFLRALPGMGSVLLLTLILFYVSAVMATKLFGASFPDRFGDLGATALTLFQVMTLEG
WADAVVRPVMEVYPYAWIFFIGFILVTTFAVINLLVGLVVNAMQEAAEADKPDEAAARHA
ELMARIAALEERLAGR
>Siccirubricoccus_sp._'liaohe'
MQETVTTAEADGSPRARVAHFVSSPGFQSLILWLIVLNAITLGLETWPSLMAGWGGVIGA
LNHALLAIFTLEIALRIHAFRGRLFQDPWGLFDVIVVAIAWVPASGPFAVLRVLRVLRIL
RLVSIVPSLRVVVEAMLASIPGMASIVALMLLLFYVCGVITTQLFGADLPERFGTFGDSL
LSLFQLMTLEGWPSDIAFPLAEKQPWAWLFIIPFILVATFVVLNLFIGVIVDSISSLKDE
REAALQQKAMAQAEADTALMLREIRALRAEVAELRAAGIGKP
>Gammaproteobacteria_bacterium
MDKNETHTLRTQIGNWVESKPVRNFIIGLILINAITLGMETAPRLVQQYGHILHFLDQGI
LSVFVIELTLKGYAYGWRFFKSGWNIFDFLIVLIALMPSSGVFSVLRVLRILRVLRLISL
IPQLRFIVEALLKAIPGIGAIFVLFLLFYYIFAVIATKTFGPEFPEWFGTLGNSMYTLFK
IMTLEGWANIADTLTDKFAYAWLFLIIFILLATFTMLNLFIAIIVDTMQNLHEQQKTEKN
PILEVTAHSETEILQQEIRALRSDIEELKTVIRNQL
>Thioalkalivibrio_sp._HL-EbGR7
MSEPTTLRGRLGQFIEARLTQRAIIALILLNALTLGLETSDTVMAWMGPVILAADTIILS
IFTAEVLAKLFVYRLSFWRNPWNVFDFFVVGIALIPASGPFSVLRVLRLLRLVSMVPKLR
FIVEALLRAIPGIISILGLLVLIFYVFAIIATGLFSESFPQKFGTLGATMYSLFQVMTLE
GWSEDIARPVMEVYPWAWAFFVPFILIATFTVLNLFIAIIVDAMQRMHDRAIEIEQQMIH
DSVHEENKALHSEIHELQQETVKLQERLIRMQSMLEKRVK
>Bacteroidetes_bacterium
MANKFNKTIISFVESNFVQQFIIGLIVVNSIIIGFETSPDIVSSYGGMLQLIDRLILAVF
VIEMLIKIYAYRLSYFMNGWNIFDFIIVSIALLPTYGSLSILRAFRIFRALRLIKNVPKL
RFIVEALFHSLPSLSWIFVLLSLVFYVFAVVGTKAFGTDFPIWFGTLGASMFTLFQIMTL
EGWAEISRTVQHTHPFAAIYFISFILIASYTTLNIFIAIVVNTMSEIQHHDNAEQIQAIE
SIITDERSELINDIKILKEYIVRLEKKIERT
>Asticcacaulis_excentricus
MTFRSARRQVLTIIEHPAFTATVVTLIILNAIVLGLETYPAIMASAGALLSSIDQILLSV
FVLELGLRLFAQGWRFFRDPWNLFDASIIIVSLLPAAGAFSVLRALRVLRVLRLISVFPS
LRRVIGGIVAALPGIGSIGAILVIIYYVSAVMASQLFGATHPQWFGTLDASLFSLFQIMT
LEGWADMARSLAATHAAAIPFMIVFILVATFTVLNLFIGVMLEAMQRVQADKGTPSPPAT
EAEAIGELTTEVAALKEQIEALTWILTRPER
>Desulfonatronospira_thiodismutans
MQQEIHKPEGLQSRALALVENQKFQRLVIAVIILNGIVLGLETSDRIMSLAGPVLLTIDK
LCLGFFVVELLIKMYAQRRQFPRDGWNVFDFLVVAVSLVPEQAGLAVLRSLRVLRVMRMI
SALPSMRRVVGAMLHALPGVSSVAGIIAIVFYVGAVMSTKLFGQEFPDMFGSIGASLYTL
FQVMTLEGWSEDVVRPVMEVYPHAWLFFVPFILVTTYTVINLVVGIIVGAMEDRAIEEGS
KQDPAVVLTRLEKRLDDMDSKMEELLREKRR
>Pirellula_sp._SH-Sr6A
MVEFCKRVTESSLFNRSILGLIVLSGILVGVETYPAFGEGTRWGELLQWIQSVILLVFVI
EIAMKIIACGSKPQKFFAEPWNLFDLAIILICLLPFNLQSAAVVRMARILRALRMITILP
RLRLLVSALLRSIPSLGYIGVLLGLHFYIYSVIGTIAFGKNDPIRFGSLHATASTLFQVL
TLEGWNDVRDTQVMGSDVTYDESWKEITSSNRISQPMPLSATFYFMSFILLGTMIMLNLF
TGVIISSMEEAQSEVADHGDRETQLAEKGFLTLHDELAIINDQLHKIAAQVAKLQNPPSE
TDRLS
>Moorea_producens
MQVALQKISNSEIFQNIILIVIILASIIVGLETYPSFTEKYGTIINFIEHIILWLFIAEI
FIKIGSEGSHPWRYFKNGWNLFDFFIVVALVLPIDNQYFIVLRMLRLLRVFRLISALPRL
QILVRALLKSLPSMGYVFLLLCILFYIYGVAGTFLFAENDPIHFSSLPKSILSLFQVVTL
EGWTDLMYIQMYGCERYGYDGIEALCTNPSASPLIGVLFFVSFVMLGAMITINLFVGIIT
SNITDSVNEFKQEQDKKLDKVLKEQNQFSKVSRLEGQLLAIQKQLKDMHSSLERIRTDIS
DY
>Leptospira_idonii
MTAIAKKIADSAKFQNFITLVILFAGILIGLETNHDFAKERETLLHSADKIIISIFIAEI
IIKMLSFGKKPYLYFFDGWNVFDFFIVAATFLPLGEGGGQYVTILRLLRLLRVLKLVRAL
PKLQILVSALLKSIPSMGYVSILLLLQFYIYGVASVFMFGANDPIHFGNLAIAMVSLFRV
VTLEGWTELMYIQMYGCNQFGYDGNEALCLHPSATPLLGAAFFISFVLSGTMIILNLFIG
VIMNGMEEAQKENEDLDLNSSLESGATNQALLAEVAQAKKDLEKANSLLEKLSQQVSRK
>Chlorobi_bacterium_OLB5
MADKIKKIVDSKIFQYFIIGVILAAGVIVGLETYPGLMNTHGDLLHLLDHIVLYIFVLEI
LLKIASKGSKPWEYFYDGWNVFDFIIVAVCFMPIGGAYIAVLRLARILRVFRLVSAMPKL
QILVGALLKSIPSMSYVGILLFLLFYIYAVIGTFMFGQNDPIHFGSLQTSMMTLFKTITL
EGWIDFMNIQYFGSDIYGYESFPDAARTPSAHPIAAPVYFVSFILLGTMIMLNLFIGVII
NGMEETNKEEEIKELAKIREQLKNISVEEEINLIAEDLNKINESLKLLKNRVNTANKP
>Microscillaceae_bacterium
MEAGGLLVAFALQKIPKLHPQKSPLAKTKPIDEHPYMTPLQQFAKRIVENTRFQNFIIFI
IVLAGISIGLDTYEHIHKQFSHQLELANHIILAIFVIEIVLKLLAEGNQPWRYFYDGWNV
FDFIIVAVAFLPIDANFVAVIRMLRLLRILRLINAIPQLRMIIGALLKSIPSMVYIFMLL
ILHFYVFGTLATILFSSNDPKHFGNLHTSFVTLFRIVTLEGWSEVLYINMYGCDKIPYEP
KDMFPCTHPHPQPVVAVAFFITFIVTGSMIVLNLFIGVVLGGIEDIKLEVAAEEKSKQRA
EQVKNNLPIELTVEEYLSLLQTQIQTLNDKLDWLVSHNPPNSASPPQGTNIPKQPTKQSG
GSKKK
>Pseudomonadales_bacterium_RIFCSPLOWO2
MRGFCARVVSAGWFEPFMIGCIIANGIIIGLETSKDIDEAYGQLLHLGNDIFLVIFIIEA
ALKITAVAPRLRLYFGNGWNLFDFTVVVLSLVPSTGEFALVARLIRVLRVLRLVSAVPQL
RLIVATLVRSIPSMGHVILLMGVIFYIYGVTGYHLFHAHDADNWGTLGAALLTLFQIVTL
EGWVDVMETAMEALPWAWVYFVTFVLIGTFVMLNLFIAVVINNLEASKVEELNALSAPPT
HDELVRELERTRAALDALQRRLAAAGGASLAIERRPA
>Acidobacteria_bacterium
MARGTCQPDRGVLLFLPCARDEPRRARPVWAEEAIAPEARPRLGGLRRRGRHRDDRFRLG
PRTRPPLLRPSRRDPRRGRPAPVTGPIFCSQESRPMITSCRRLAANPRFQNAVLFVIVAN
AVLIGLETSATLSERHGALFHAVNLVVQVIFAVEIAIRLLAHAPRFDRFFRDGWNVFDFT
IVGLSLLPVAGPFATVARLARLLRALRIVSALPELRLIVATMLRSIPSLANVIVLLGLIL
YVYAVVGIHLFGGVDPAHWGSLPRAGLTLFEILTLEGWVDLMDASLAATRWAWFYYVSFV
VLAVFVVINLFIAIVINNLEAAKKDDAVFGAGERELPARLAQIREQLAEVETALRASKER

>Kangiella_aquimarina
MHARVIALVHNKWFERFIISVIVLSGILIGLETSRALSQTHVSWIETAHAVILGIFVIEV
VLKLYACAPDIKKYFKDGWNVFDFSIVVVALIPMTGQFAVIGRLLRLLRVARLISVLPEL
RLIVSTLIKTIPSMFHVVVLMLVLFYIYAVAGFNLFHETNPQFWGDLGTSMLTLFRIVTL
EGWTQVMYLDLANHTWAWMFYVSFIVIGTFIIINLFIALVLNNLDEVKEQKKAMERSQKT
EAHILNNIVLIRKQLQEIEKEMHEKQ
>Euryarchaeota archaeon
MTESVRARIRVLVESERFNNIVFVAILASSIAIGFETYEWGPRGDTFLQRIDGLFLTVFV
LEILLRIYAMGRDFFRDPWCVFDFLVVGIALIPARDFFAVFRVFRVLRAFRLVSRIPELK
LVAESLIFSVRGLSAVATLLFVVTYVFAVLSTALFQSVSPEYFGSLGRSLYSLFQVMTLE
SWSNGIVRDLINEKGWWVAVYFVIFIFMTTFTFLNMFVAIFTNTVVALEADSEEGVNTEL
RRIHAKMDLLMATLGVEYEEEE
>Methanolobus psychrotolerans
MVTFDNLKKIVTHKYFEVFIISIIILAGILVGVQTYPDFSAKHHDLITALDTLIIIIFVI
EAILKIASEMPRPLQYFKNSWNVFDFIIVVGVLLPLGGSFLPVLRLLRVLRVFRLITTIP
KMRLIVGALLKSIPSMIHVFLLLGIIFYIYAVMATFAFSENDPIHFENLQTSLLTLFRMV
TFEDWTDVMYINMYGCDQYGYEGARLECTNPSASPIGAALFFTSFVLIGGLIVLNFAIGV
VINSMDEMKEEMVNEYPAYNKLAEKGKQENIIDRLNKMDEKLDALLNDRSP
>Euryarchaeota archaeon
MVNIPDFCRRIVEAPWFTGFIITVIVFAGILVGMETSASLMAELGSTIEVLNNIVLYIFV
AEIVLKMTAAAPKPWRFFCDGWNVFDFLIVAVCFVPFGGGFAPVLRLFRLFRTLRLVSVI
PRLQLIVSALLRCLPSMVYVSILLFLVFYIYAVAGTMLFGANDPVHFGGLWTSMLSLFRV
VTLEDWTDVMYLQMFGSDVYEGYNQSIEGQTVVPKAQPLLGAFYFVSFVLVGTMIMLNLV
IGVIINGMDEAQKEVADRRLHELLSQGGEGDDQIQREARIASLRTKVAELSEELDKLS
>Euryarchaeota archaeon
MEDGSESNHQTQIRKIVDSERFNNIVFIAILASSISIGFETYDWGEGGNRFLVYLDWFFM
TIFVTEILFRIYAMRFDFFKDPWCVFDFIIVGIALFPSSGVFRVFRVFRVLRAFRLVSRI
PELKLVAESLIYSVRGLSAVATLLMVVIYVFAVLSTVLFQNSGSEGALYFGTLGKSLYSL
FQVMTLESWSNGIVRYLIDEEGWWVGFYFVVFIFMTTFTFLNMFVAIFTNTVVALEADSE
EGINSEVRKIQSQLDVLVEEIQQLRTELEN
>Candidatus Nitrosocosmicus exaquare
MLPERYQHDLLTSIRKIVNNPSFNHFITIVILIQAAVLVLETIPTFNAYYSILESISMGV
LIVYIIEAGLKISGSYPNFSNYFKNGWNILDFSIIILSLIPLGGGYSTIARLIRLLRVTR
LSNRSKEMSVVVMTIIKSIPSMVNIFLLLSLLFFMYSIAGYHLFSSIDPAHWGSLPRAII
TLFQILTLEGWVEVMAPATHANPLNILFFISFIVIGTFIVINIFVAVIVRKSEEAYKALE
EEIRHPATQNEILFEIKEIRKKIDELESRLTK
>Candidatus Nitrosotenuis aquarius
MESSAKISSLVNSKRFGLAITAIIVIQAIVLGLETFSELADFSNVFEFIHWFVVGVFIVE
AGLKMASQYPQPQLYFRDGWNVFDFAIIVLSLVPFTGSFSTVARLVRLLRITRLTNRSKE
MRIMVATIAKSLPSMMNIMFLLGILFFIYGVAGYHLFSQIDPVHWGTLPDSLITLFKIIT
LEGWVELMNPVTSVSMFNVAFFISFIVIGTFVVINLFVAIIVKKTEEAYKQIQNQTTPSQ
HEILSEIKEIRRMIEDLEKRISKA
>Candidatus Nitrososphaera gargensis
MEEKPSLPRSKLPSERADDTVVNILRGIVGSRAFDFTITSVILLQAVALALEATPALYSN
NNGERTNDAARLFGTVHTAVVMVFIVEAGMRLGALCPKPQDYFKDGWNSFDFAVIVLSLI
PVTGPFATIARLIRLLRVTRLVTKSKELRAIVSTLVRSIPSIFNILILLGMLFFIYAIIG
YHLFSNVDPQRWSSFLASLTTLFQVITLEGWIDITEPIVSQLGPLYWLYFATFIVIGTFI
IINLFISVIVRKSEEAYKQLQLESGTPLTQQEIAEELREIHRILEELERRISRQDDDSKN
GSDRIDKN
>Euryarchaeota archaeon
MRRDLTFSKNRGYYGFCRRCIHELTTIPLLVEGNITPETQSKIREIVDSERFNNIVFIAI
LASSISIGFETYDWGSRGNQFLVYLDWFFMTIFVTEILFRIYAMRFDFFKDPWCLFDFVI
VGIALFPSSGVFRVFRVFRVLRAFRLVSRIPELKLVAESLIYSVRGLSAVATLLMVVIYV
XAVLSTVLFQNSGSEGALYFGTLGKSLYSLFQVMTLESWSNGIVRYLIDEEGWWVGFYFV
VFIFMTTFTFLNMFVAIFTNTVVALEADSEEGINSEVRKIQTQLDVLVDEIKQLREGLGE
K
>Candidatus Poseidoniales archaeon
MGIIRRSVDVRKVGLKPVTEEFRERVKALVESDRFNNIVFIVIVISSIAIGLETYDLDEK
GLSFLNGLDQVFMTVFVLEITLRLYAMRLEFVKDPWCIFDFIVVGVALVPQAGVLAVFRV
LRVLRAFRLVSRIPELKLVAESLIYSVRGLTAVAMLLTIVIYVFAVLSTVLFSGSGPEGE
EYFGTLGRSLYSLFQVMTLESWSNGIVRLLMEREGWWVGVYFVIFIFMTTFTFLNMFVAI
FTNTVVALESDSEDGMHTDVRRLMTKVDDLHAEVVALRGQTAQGEEQ
>Reichenbachiella versicolor
MIKLFVIQIQTTNKDMNHILFKVEHFLESAGFQRTLTAIICINAILIGLETNEQIVESFG
GAIDLIDYLILAFFVIELSVKLVVYRGRFFKSGWNLFDALIVLISVLPAAGSFTVFRALR
VVRTLRLLKNVPKLRLIIESLIHSVPSIGWISVLLMVLFYVYAVVGHSLFSETHPVLYGD
LSKSFFTLFQIMTLESWATAIARPVMMNGVIYGLYFVSFILIATYTTLNLFIAIVVNTMN
ELNLRDIQSEEKKMLEILTSENQQIKNQIQELKELIIADNKKPTNEIYEIESQEKGVKIS
A
>Reichenbachiella versicolor
MTGHREKLAEFLESGGVQHFIVSLIVINSLSIGMETSRSWMESYGRWFDFVDNIILGIFV
LELILKFYAFGFKFFKNSWNLFDFAIVAVALVPTAGAFSIFRTMRILRTLRLIKNVPKLR
LIIEALIKSVPSIGWIAVLLITVFYIFAVLATNLYGQAFPDWFGNIGVSMFTLFQVMTLE
GWSTGIARPMMEVIPNAYLFFIPFILIATYTTLNIFIAIVVNTMNELHHQDVEADDEIAR
QMMYQNFETMQKKLDDLSNKLEAMNERTKEPAG
