# Supplementary material for: A native prokaryotic voltage-dependent calcium channel with a novel selectivity filter sequence
Source: eLife. 2020 Feb 25;9:e52828. doi: 10.7554/eLife.52828 (PMC7041947; doi:10.7554/eLife.52828)
Supplement: Figure 2—source data 1. [file elife-52828-fig2-data1.csv]

Vm(mV)	150mM Na (nA)	1	2	3	4	75mM Na (nA)	1	2	3	4	75mM Na 50mM Ca (nA)	1	2	3	4	5	6	7	50mM Ca (nA)	1	2	3	4	5	6
-80			-0.0266	-0.194	0.0768		0.123		-0.0425	0.155			-0.0162	0.0101	0.0811	4.23E-03	-0.0498	0.056			9.51E-03	-0.0147	0.0395	0.185	-0.0605
-70			0.0131	-0.059	-0.0312		0.387		-0.0181	0.142			-1.17E-03	-0.0135	0.0354	-9.87E-04	0.0337	0.111			6.34E-03	6.31E-03	-0.03	0.152	0.192
-60		5.75E-03	-0.0193	-8.42E-03	0.0377		0.487	2.30E-03	0.0181	0.299		9.20E-03	0.0655	0.0825	0.328	0.0406	0.0773	0.0631		0.0897	0.139	0.0724	0.351	0.379	0.193
-50		0.0632	0.0599	0.0995	-0.0846		0.404	0.0989	-0.106	0.856		0.0713	0.763	0.343	2.05	0.315	0.451	0.11		0.585	1.1	0.987	1.46	1.3	0.325
-40		0.0713	0.265	0.243	0.107		0.25	0.336	0.297	0.835		0.88	2.19	1.97	2.58	2.24	2.51	0.351		1.29	1.81	1.91	1.68	1.34	1.05
-30		0.183	0.324	0.0934	0.0742		0.0521	0.322	0.499	0.776		1.67	1.9	1.95	2.07	1.89	2.53	1.28		1.24	1.59	1.62	1.4	0.934	1.54
-20		0.225	0.26	0.482	0.268		0.282	0.261	0.465	0.571		1.66	1.57	1.64	1.83	1.57	1.88	1.48		1.15	1.3	1.32	1.23	0.926	1.51
-10		0.286	0.135	0.4	0.131		0.445	0.107	0.234	0.708		1.29	1.27	1.26	1.36	1.26	1.62	1.31		1.03	1.03	1.08	0.982	0.753	1.23
0		0.114	-0.0935	0.385	-0.0924		0.419	0.137	0.122	0.524		1	1	1	1	1	1	1		0.601	0.81	0.869	0.812	0.658	0.912
10		0.179	-0.161	0.0819	5.86E-03		0.438	0.0989	0.0387	0.701		0.794	0.743	0.731	0.73	0.744	0.91	0.826		0.66	0.588	0.652	0.47	0.565	0.915
20		0.0552	-0.269	0.098	-0.054		0.405	0.152	0.0379	0.639		0.552	0.511	0.53	0.58	0.526	0.624	0.716		0.511	0.412	0.444	0.508	0.345	0.627
30		0.0989	-0.0526	0.123	-0.0267		0.725	0.0391	0.0231	0.582		0.411	0.347	0.358	0.33	0.362	0.635	0.592		0.291	0.277	0.317	0.372	0.48	0.74
40		0.0563	-0.0883	0.075	-0.496		0.353	0.0333	-0.0252	0.669		0.309	0.213	0.258	0.181	0.221	0.458	0.493		0.103	0.149	0.215	0.232	0.4	0.514
50		-0.0115	-0.128	-5.36E-03	-0.185		0.564	0.0575	-0.0572	0.709		0.297	0.13	0.129	0.238	0.134	0.296	0.498		0.268	0.113	0.135	0.106	0.444	0.446
60		9.20E-03	-0.176	0.0436	-0.267		0.632	0.0862	-0.0614	0.787		0.223	0.0889	0.11	0.0688	0.0794	0.469	0.434		0.26	0.0394	0.0778	0.162	0.456	0.504
70		0.0322		0.143	-0.437		0.531	-0.0299	-0.117	0.545		0.167	8.34E-03	0.133	0.17	0.0362	0.412	0.316		0.136	0.033	0.0593	0.139	0.515	0.399
80		-0.118		-0.155	-0.652		0.657	-0.0368		0.437		0.216	5.50E-03	0.109	-0.0191	0.0175	0.358	0.277		0.1	0.0122	0.0736	0.092	0.317	0.576
90		-0.092		-0.172	-0.585		0.675			0.283		0.108	-0.0163	0.021	0.139	-0.0289	0.315	0.163		1.15E-03	8.51E-03	0.0337	0.0838	0.436	0.416
100				-0.287	-1.01		0.482			0.303		0.0954		0.0425	0.045	-0.0503	0.199	0.118		0.0655	-0.0387	-0.0198	-8.86E-03	0.276	0.306
