# Supplementary material for: A native prokaryotic voltage-dependent calcium channel with a novel selectivity filter sequence
Source: eLife. 2020 Feb 25;9:e52828. doi: 10.7554/eLife.52828 (PMC7041947; doi:10.7554/eLife.52828)
Supplement: Figure 2—source data 2. [file elife-52828-fig2-data2.csv]

Extracellular Ca concentration (mM)	Reversal potential (mV)	1	2	3	4	5	6	7
4		31.39	48.22	42.1	33.4	35.77	31.7
10		50.58	47.21	50.91	52.6	52.95	42.1	44.18
20		58.32	56.53	56.97	62.69	64.37	53.27	66.39
40		85.58	84.23	77.8	79.52	70.77	69.09
