# Supplementary material for: A native prokaryotic voltage-dependent calcium channel with a novel selectivity filter sequence
Source: eLife. 2020 Feb 25;9:e52828. doi: 10.7554/eLife.52828 (PMC7041947; doi:10.7554/eLife.52828)
Supplement: Figure 3—source data 2. [file elife-52828-fig3-data2.csv]

x	Px/Pna	1	2	3	4	5	6	7	8	9	10	11	12	13	14	15	16	17	18	19	20
Ca		139.796625	461.5796527	296.8590769	160.6778556	189.590769	142.8207393	219.2879476	171.5779172	224.6431951	254.2575812	260.8771374	118.7436307	137.8516538	193.922186	169.8350972	175.4563032	268.52251	304.4924148	133.5421767	354.3173135
Sr		49.8	39.74	25.59	45.58	40.7930832	41.80591233
