# Supplementary material for: A native prokaryotic voltage-dependent calcium channel with a novel selectivity filter sequence
Source: eLife. 2020 Feb 25;9:e52828. doi: 10.7554/eLife.52828 (PMC7041947; doi:10.7554/eLife.52828)
Supplement: Figure 3—source data 3. [file elife-52828-fig3-data3.csv]

X	PX/PCa	1	2	3	4	5	6	7	8	9	10	11	12	13	14	15	16	17	18	19	20
Na		7.15E-03	2.17E-03	3.37E-03	6.22E-03	5.27E-03	7.00E-03	4.56E-03	5.83E-03	4.45E-03	3.93E-03	3.83E-03	8.42E-03	7.25E-03	5.16E-03	5.89E-03	5.70E-03	3.72E-03	3.28E-03	7.49E-03	2.82E-03
K		8.50E-03	6.54E-03	3.74E-03	2.53E-03	2.34E-03	4.39E-03	2.27E-03	2.00E-03	2.21E-03	1.54E-03
Cs		3.84E-03	2.52E-03	3.39E-03	4.54E-03		1.62E-03	1.11E-03	1.13E-03	8.98E-04	1.11E-03	1.32E-03
