# Supplementary material for: A native prokaryotic voltage-dependent calcium channel with a novel selectivity filter sequence
Source: eLife. 2020 Feb 25;9:e52828. doi: 10.7554/eLife.52828 (PMC7041947; doi:10.7554/eLife.52828)
Supplement: Figure 4—source data 1. [file elife-52828-fig4-data1.csv]

[Ca2+]	Normarized current	1	2	3
0		0.025059173	0.034818436	0.067320975
0.9		0.067946405	0.112288329	0.044768446
90		1	1	1
