# Supplementary material for: A native prokaryotic voltage-dependent calcium channel with a novel selectivity filter sequence
Source: eLife. 2020 Feb 25;9:e52828. doi: 10.7554/eLife.52828 (PMC7041947; doi:10.7554/eLife.52828)
Supplement: Figure 4—source data 2. [file elife-52828-fig4-data2.csv]

Ca/(Ca+Na)	Normarized current	1	2	3	4	5
0		0.027846596	0.132945365	-0.002432428	0.044033694	0.015551424
0.2		0.262585324	0.40786633	0.407132824	0.334731807	0.228473124
0.4		0.553782872	0.68738458	0.696862321	0.530970145	0.579557089
0.6		0.53097652	0.696803058	0.700699383	0.84609358	0.587401367
0.8		0.915829554	0.820226208	0.853207911	1.038638746	0.715238348
1		1	1	1	1	1
