# Supplementary material for: A native prokaryotic voltage-dependent calcium channel with a novel selectivity filter sequence
Source: eLife. 2020 Feb 25;9:e52828. doi: 10.7554/eLife.52828 (PMC7041947; doi:10.7554/eLife.52828)
Supplement: Figure 4—source data 3. [file elife-52828-fig4-data3.csv]

X	Px/PNa	1	2	3	4	5
Ca		107.921102	131.9064326	146.4691631	181.7035434	153.0660194
Sr		19.04969876	18.39620807	18.98052227	16.0053922	31.24583943
