# Supplementary material for: A native prokaryotic voltage-dependent calcium channel with a novel selectivity filter sequence
Source: eLife. 2020 Feb 25;9:e52828. doi: 10.7554/eLife.52828 (PMC7041947; doi:10.7554/eLife.52828)
Supplement: Figure 5—source data 1. [file elife-52828-fig5-data1.csv]

Vm(mV)	150mM Na (nA)	1	2	3	4	5	6	7	8	75mM Na (nA)	1	2	3	4	5	6	7	8	75mM Na 50mM Ca (nA)	1	2	3	4	5	6	50mM Ca (nA)	1	2	3	4	5	6	7	8
-70		-0.0206	-0.0306	-0.0268	-0.0164	0.0271	0.0162	-0.0279	-0.0101		-0.106	2.92E-03	7.32E-03	8.04E-03	6.41E-03	9.11E-03	0.0108	-0.012		0.023	0.0108	-6.71E-03	0.0476	0.0826	0.0141		0.0365	0.0118	0.0384	-0.271	0.0858	0.0598	7.81E-03	0.0258
-60		-0.0587	0.0197	-0.0207	0.0522	0.013	0.0104	-0.0452	0.0111		-0.215	-3.07E-03	2.24E-03	0.0177	-9.79E-03	-0.0207	-7.81E-04	-0.0184		0.05	8.30E-03	0.0364	0.0522	0.0235	0.0275		0.0237	4.15E-03	0.0425	-0.346	0.055	-5.11E-03	0.0434	0.0345
-50		-0.0575	-0.0215	-0.0108	-1.34E-03	9.44E-03	0.0151	-0.031	7.75E-03		-0.283	-0.0272	0.0205	0.0482	6.77E-03	0.0449	-1.69E-03	0.0165		0.0519	0.0172	0.0683	0.072	0.0274	0.0457		0.0734	0.0149	0.0277	-0.355	0.0516	0.108	0.0469	0.0647
-40		-0.0976	0.105	0.0224	0.0332	0.0153	0.034	-1.56E-03	0.0382		-0.341	-0.0271	0.024	0.073	0.0326	0.0327	0.0309	-0.0247		0.0346	0.014	0.0929	0.0502	0.0443	0.0374		0.063	8.45E-03	0.0734	-0.584	0.0564	-6.44E-03	0.0266	0.0855
-30		-0.0147	3.46	0.0356	0.0506	0.0369	0.0231	-0.0615	0.0395		2.89	2.02	0.0679	0.0596	0.0459	0.0642	0.201	0.18		0.0367	0.012	0.0417	0.145	0.0539	0.0707		0.0677	0.0277	0.134	-0.629	0.105	0.0944	0.0503	-2.06E-03
-20		3.95	2.7	0.237	4.75	0.0904	0.171	0.154	0.0749		1.21	0.999	0.331	1.31	0.391	0.65	0.647	0.746		0.0689	0.0455	0.0539	0.11	0.0616	0.0533		0.0426	8.45E-03	0.104	-0.908	0.0892	0.0393	0.0922	0.0769
-10		2.44	2.13	2.47	2.77	2.34	2.62	2.56	2.53		0.124	0.552	0.272	0.768	0.236	0.57	0.253	0.253		0.225	0.872	0.126	0.351	0.102	0.145		-0.0966	-0.102	0.0549	-1.02	0.0774	0.0318	0.0421	0.106
0		1	1	1	1	1	1	1	1		-0.978	0.0581	0.0968	0.174	0.0618	0.157	0.129	0.0883		0.509	0.277	0.168	0.267	0.144	0.129		-0.63	-0.344	0.121	-1.24	0.057	0.0516	0.0565	0.127
10		-0.314	0.201	0.37	0.446	0.362	0.358	0.277	0.343		-2.14	-0.392	-0.0344	-0.0335	-0.068	-0.0858	-0.166	-0.17		-0.546	-0.134	0.0791	0.239	0.0853	0.0521		-1.02	-0.409	0.12	-1.44	0.0564	0.354	0.0289	0.0632
20			-0.692	-0.0423	-0.0707	0.0299	-0.0176	-0.257	-0.229		-3.03	-0.912	-0.216	-0.332	-0.275	-0.333	-0.432	-0.422		-1.27	-0.485	0.0817	0.235	0.0515	-0.0124		-0.967	-0.529	0.0998	-1.28	0.0677	-1.4	0.0482	0.0751
30			-1.69	-0.392	-0.566	-0.279	-0.443	-0.811	-0.829		-4.01	-1.43	-0.413	-0.598	-0.478	-0.648	-0.704	-0.738		-2.22	-0.849	-0.0122	0.384	-0.0132	-0.112		-1.23	-0.679	0.109	-1.12	0.111	-3.9	0.015	0.107
40			-3.17	-0.68	-0.981	-0.552	-0.867	-1.35	-1.45		-5.01	-1.77	-0.609	-0.955	-0.696	-0.928	-1.01	-1.02		-3.07	-1.21	-0.0986	-0.268	-0.128	-0.272		-1.5	-0.852	0.176	-0.893	0.0547	-3.9	-6.51E-04	0.115
50			-3.9	-1.05	-1.46	-0.901	-1.16	-1.89	-2.04		-5.95	-2.07	-0.831	-1.19	-0.79	-1.23	-1.3	-1.32		-4.08	-1.67	-0.158	5.02E-03	-0.215	-0.369		-1.94	-1.02	0.0295	-0.902	0.016	-4.17	-0.0105	-8.24E-03
60			-4.88	-1.31	-2.01	-1.18	-1.55	-2.35	-2.63		-6.83	-2.92	-0.93	-1.55	-1.07	-1.46	-1.54	-1.66		-4.94	-1.91	-0.29	-0.174	-0.297	-0.541		-2.23	-1.21	-3.25E-03	-1.05	8.01E-03	-4.02	-0.0371	0.0578
