# Supplementary material for: A native prokaryotic voltage-dependent calcium channel with a novel selectivity filter sequence
Source: eLife. 2020 Feb 25;9:e52828. doi: 10.7554/eLife.52828 (PMC7041947; doi:10.7554/eLife.52828)
Supplement: Figure 5—source data 2. [file elife-52828-fig5-data2.csv]

Vm(mV)	G/Gmax	1	2	3	4
-60		0.024886911	-1.24E-03	-0.01899772	0.055785131
-50		-0.062895958	4.66E-03	0.013920746	-0.038567615
-40		-0.037104115		3.11E-03	0.075757556
-30		-0.110859769	0.58778896	0.012446793	0.193526362
-20		0.260632723	0.69780649	0.098755451	0.362947277
-10		0.669683349	0.894583047	0.649361515	0.531681004
0		0.657014149	0.920508188	0.79495801	0.721074344
10		0.773302357	0.940373289	0.889125365	0.829201411
20		0.797737777	0.965283189	0.915166759	0.809230086
30		0.749774254	1	0.933019233	0.885676149
40		0.905881809	0.991908462	1	1
50		1	0.995779958	0.955944027	0.768594751
