# Supplementary material for: A native prokaryotic voltage-dependent calcium channel with a novel selectivity filter sequence
Source: eLife. 2020 Feb 25;9:e52828. doi: 10.7554/eLife.52828 (PMC7041947; doi:10.7554/eLife.52828)
Supplement: Figure 6—source data 1. [file elife-52828-fig6-data1.csv]

	4mM Ca				10mM Ca				20mM Ca				40mM Ca				60mM Ca				80mM Ca
Vm(mV)	Normarized current	1	2	3	G/Gmax	1	2	3	G/Gmax	1	2	3	G/Gmax	1	2	3	G/Gmax	1	2	3	G/Gmax	1	2	3
-60		1.64E-03	0.0896	0		4.06E-03	0.148	0		3.29E-03	0.108	0		1.50E-03	0.242	0		3.32E-03	0.224	0		2.31E-03	0.179	0
-50		0.02492655	0.1	-2.70E-03		7.20E-03	0.165	6.39E-05		5.70E-03	0.089	-4.35E-04		6.61E-03	0.179	6.00E-03		9.05E-03	0.185	-2.88E-03		6.68E-03	0.382	-0.033052213
-40		1	0.386	1.29E-03		0.50545348	0.165	1.68E-03		0.024681866	0.175	8.98E-03		0.012760451	0.23	-1.97E-04		9.23E-03	0.215	-2.79E-03		0.010592901	0.454	0.021324052
-30		0.907986828	0.817	0.171404794		0.829636658	0.497	0.037769776		0.635123067	0.322	0.034085249		0.152216331	0.304	7.98E-03		0.046077468	0.409	0.014516999		0.021815148	0.548	0.031969641
-20		0.800340459	0.991	0.818340495		0.74818329	0.844	0.445589511		0.604638053	0.654	0.283333438		0.544678797	0.539	0.052033695		0.474374058	0.51	0.044706071		0.293909695	0.451	0.052274617
-10		0.684171457	1	1		0.653055757	0.934	0.809358842		0.538071664	0.783	0.558862363		0.511361835	0.717	0.333646457		0.462662276	0.74	0.327124907		0.350405202	0.649	0.19189215
0		0.561567227	0.957	0.938621243		0.545238042	0.904	0.827191555		0.459411174	0.778	0.57764075		0.450846124	0.723	0.519372361		0.408963554	0.678	0.464306204		0.320549199	0.976	0.386692023
10		0.43909918	0.806	0.81545844		0.430708824	0.809	0.736226706		0.370822124	0.685	0.515901736		0.373304125	0.735	0.520588227		0.351104538	0.795	0.4522376		0.259334152	0.868	0.398846187
20		0.305970866	0.67	0.640238526		0.316983312	0.675	0.577488542		0.27422727	0.603	0.411211102		0.288351286	0.672	0.464027905		0.271325557	0.734	0.367027854		0.200531339	0.751	0.336530763
30		0.182736507	0.394	0.422638899		0.198748116	0.514	0.418543229		0.174800469	0.557	0.281658244		0.196301278	0.586	0.34669676		0.185953006	0.728	0.280620254		0.133617793	0.705	0.248583065
40		0.057684322	0.155	0.205377013		0.083589887	0.284	0.216168957		0.074989675	0.368	0.140649219		0.098552771	0.435	0.219679209		0.106838198	0.522	0.185503445		0.056845454	0.919	0.14699064
50		-0.068102361	-0.102	-0.019221053		-0.036917899	0.0635	0.019922203		-0.027513646	0.127	-0.013694762		5.59E-04	0.294	0.079381691		0.02670955	0.289	0.050533225		-7.73E-03	0.503	0.116040075
60		-0.18923927	-0.276	-0.240103069		-0.148056036	-0.0696	-0.170981042		-0.126310766	2.01E-03	-0.156868882		-0.105474689	0.0836	-0.0735023		-0.062928504	0.301	-0.088386311		-0.098378077	0.353	-0.084609468
70		-0.3059011	-0.502	-0.448745811		-0.255383714	-0.322	-0.373445379		-0.22105319	-0.132	-0.316908474		-0.202733717	-0.0381	-0.242710428		-0.151272534	0.155	-0.213728667		-0.163892951	0.416	-0.170197484
80		-0.416794664	-0.633	-0.638538114		-0.361872523	-0.575	-0.550160359		-0.317612882	-0.353	-0.464897475		-0.295727521	-0.226	-0.405623069		-0.241399788	-0.261	-0.390997542		-0.232450187	-0.157	-0.301074286
90		-0.521290395	-0.937	-0.813037514		-0.459341408	-0.843	-0.724434599		-0.405851984	-0.581	-0.61143194		-0.378373612	-0.349	-0.552526796		-0.329499358	-0.266	-0.5045595		-0.321633086	-0.0415	-0.462500867
