# Supplementary material for: A native prokaryotic voltage-dependent calcium channel with a novel selectivity filter sequence
Source: eLife. 2020 Feb 25;9:e52828. doi: 10.7554/eLife.52828 (PMC7041947; doi:10.7554/eLife.52828)
Supplement: Figure 6—source data 2. [file elife-52828-fig6-data2.csv]

	4mM Ca					10mM Ca					20mM Ca					40mM Ca					60mM Ca				80mM Ca
Vm(mV)	G/Gmax	1	2	3	4	G/Gmax	1	2	3	4	G/Gmax	1	2	3	4	G/Gmax	1	2	3	4	G/Gmax	1	2	3	G/Gmax	1	2	3
-60		0	-0.103	-5.37E-04	0		0	2.53E-04	-0.059	0		0	-1.16E-03	0	1.80E-03		0	-0.102	0	2.21E-04		-0.015	0	3.66E-03		-0.0301	0	-3.38E-03
-50		-0.011221283	-0.117	0.028374854	-4.73E-03		0.02949283	0.011709749	-0.0671	-4.27E-03		2.89E-03	-0.0833	5.55E-03	9.06E-03		0.036805334	0.0486	-6.03E-03	6.79E-03		-0.201	0.012043815	-5.68E-04		-0.0903	-0.047400401	7.76E-03
-40		0.124916903	0.0602	0.929364695	0.016234708		0.070152984	0.783574193	0.0509	7.95E-03		0.027019356	-0.0139	0.017615333	0.040936832		0.039528097	-0.134	-9.23E-03	0.022377958		0.0255	0.016945707	0.013856018		-0.174	2.10E-03	7.10E-03
-30		0.4792539	0.541	0.923272665	0.182251911		0.317262948	0.77350647	0.218	0.074175976		0.19566991	0.0741	0.079370183	0.567087919		0.131225772	-0.106	0.015898771	0.161379852		-0.125	0.03464019	0.057128532		-0.059	0.032024198	0.030615804
-20		0.861962462	0.634	0.927439836	0.825870389		0.673553255	0.759337082	0.341	0.435485924		0.566647817	0.238	0.291793018	0.560144314		0.318603286	0.168	0.082305922	0.494019329		0.0799	0.074808725	0.431525376		0.122	0.041499691	0.284979542
-10		0.954491103	0.581	0.931949651	1		0.861966779	0.755326118	0.56	0.808794265		0.797645667	0.383	0.55357656	0.538144475		0.723197558	0.356	0.380813183	0.482530637		0.373	0.366309428	0.435596807		0.262	0.241982595	0.341571431
0		1	0.731	0.935109042	0.976839682		0.918332197	0.75636917	0.591	0.836136931		0.850762762	0.521	0.589283923	0.522710324		0.813384386	0.583	0.554407633	0.468232757		0.498	0.512511743	0.418426755		0.234	0.430044373	0.344759544
10		0.960966166	0.747	0.946819446	0.934251681		0.935825657	0.760410368	0.615	0.787792579		0.825099932	0.492	0.587844836	0.514723667		0.873775134	0.419	0.566594907	0.455039404		0.365	0.517503579	0.407411215		0.433	0.45770184	0.333333837
20		0.921425118	0.822	0.951364534	0.838687264		0.893964379	0.76631092	0.635	0.733152218		0.822725742	0.586	0.528392526	0.509674689		0.833964292	0.492	0.551124714	0.443171786		0.579	0.473926204	0.402014048		0.535	0.433282321	0.328725259
30		0.834011776	0.757	0.962314065	0.790207998		0.847182053	0.775335591	0.52	0.698299313		0.841039377	0.525	0.512967304	0.509644455		0.85004403	0.493	0.510695345	0.439226327		0.567	0.455847665	0.389704519		0.5	0.409042687	0.319446124
40		0.796326913	0.889	0.971056557	0.745461365		0.785517875	0.786068448	0.755	0.646492156		0.752881403	0.568	0.487243612	0.512990285		0.8572961	0.51	0.492796692	0.438500726		0.5	0.430798545	0.395385879		0.413	0.380886037	0.31483805
50		0.77564988	0.954	0.977748216	0.71816367		0.761031348	0.796483855	0.73	0.605478157		0.695015929	0.598	0.468220672	0.518039263		0.775570021	0.483	0.467837514	0.439699984		0.307	0.458141211	0.394123634		0.705	0.416193154	0.313354597
