# Supplementary material for: A native prokaryotic voltage-dependent calcium channel with a novel selectivity filter sequence
Source: eLife. 2020 Feb 25;9:e52828. doi: 10.7554/eLife.52828 (PMC7041947; doi:10.7554/eLife.52828)
Supplement: Figure 6—source data 3. [file elife-52828-fig6-data3.csv]

X	Px/PNa	1	2	3	4	5	6	7	8	9	10	11	12	13	14	15	16	17	18
Ca		0.592351991	0.498909122	0.367676683	0.340654754	0.221549393	0.357439521	0.418770193	0.789233513	0.39466802	0.274980426	0.236144217	0.163326919	0.103259299	0.207687991	0.142786728	0.139365535	0.146537149	0.146537149
Sr		0.557948545	0.360795026	0.322654376	0.447060214	0.397726974	0.264565049	0.366695877	0.376259448	0.389706958
K		0.168008295	0.176712194	0.20985332	0.281872942	0.100811718	0.0960569	0.057975168	0.26479468	0.075339154
Cs		3.25E-03	3.25E-03	5.18E-03	4.63E-03	5.18E-03	6.56E-03	8.02E-03
