# Supplementary material for: A native prokaryotic voltage-dependent calcium channel with a novel selectivity filter sequence
Source: eLife. 2020 Feb 25;9:e52828. doi: 10.7554/eLife.52828 (PMC7041947; doi:10.7554/eLife.52828)
Supplement: Figure 7—source data 1. [file elife-52828-fig7-data1.csv]

X	Px/PNa	1	2	3	4	5	6	7	8
Ca		236.9967013	242.3024173	162.1677327	240.1197271	216.7389895	207.449253	202.9593333
Sr		49.8	96.83030551	99.01174538	99.46149699
	Px/PCa
Na		4.22E-03	6.17E-03	4.13E-03	4.93E-03	4.82E-03	4.61E-03	4.16E-03
K		7.35E-03	2.80E-03	3.22E-03	4.63E-03
Cs		4.59E-03	8.19E-03	9.45E-03	0.023643324	0.022544845	0.02304093	0.019423026	9.14E-03
