# Supplementary material for: A native prokaryotic voltage-dependent calcium channel with a novel selectivity filter sequence
Source: eLife. 2020 Feb 25;9:e52828. doi: 10.7554/eLife.52828 (PMC7041947; doi:10.7554/eLife.52828)
Supplement: Figure 7—source data 2. [file elife-52828-fig7-data2.csv]

X	Px/PNa	1	2	3	4	5	6	7	8	9
Ca		26	10.97730241	11.01650662	12.76525188	12.38662775	11.80661933	11.58507621
Sr		24.41129175	23.68000779	24.32196751	25.42575812	24.4471159
K		1.02119015	0.953414153	0.927002964	1.081716903
Cs		0.613778264	0.560021297	0.711536774
