# Supplementary material for: A native prokaryotic voltage-dependent calcium channel with a novel selectivity filter sequence
Source: eLife. 2020 Feb 25;9:e52828. doi: 10.7554/eLife.52828 (PMC7041947; doi:10.7554/eLife.52828)
Supplement: Figure 8—source data 1. [file elife-52828-fig8-data1.csv]

	CavMr-G4D												CavMr-V6T
X	Px/PNa	1	2	3	4	5	6	7	8	9	10	11	Px/PNa	1	2	3	4	5
Ca		0.960676277	1.110597956	0.652638396	0.822875804	8.198573519	22.90400881	18.84046083	5.820436535	8.847185284	6.729253614	10.09046456		32.01694027	31.01043449	35.2754708	43.19504305	59.23399478
Sr		16.5712303	8.268115937	32.66168022	16.89857224									13.31755315	13.90470977	14.17763376	13.23172511	11.92543618
K		1.074867207	1.039142937	1.320582709	1.372274195									1.095	0.541704193	0.440714435
Cs		1.063989259	0.677178784	0.798123741	0.934190687									0.59359	0.140237927	0.938780231
