# Supplementary material for: A native prokaryotic voltage-dependent calcium channel with a novel selectivity filter sequence
Source: eLife. 2020 Feb 25;9:e52828. doi: 10.7554/eLife.52828 (PMC7041947; doi:10.7554/eLife.52828)
Supplement: Figure 8—source data 2. [file elife-52828-fig8-data2.csv]

X	Px/PNa	1	2	3	4	5
Ca		17.5	11.52316404	10.29595096	11.11912163	9.107283245
Sr		3.2	4.200924258	4.530250107	5.007421043	4.186701706
K		1.12	1.522487613	1.565821983	1.758145771	1.752393942
Cs		1.47	1.614676349	2.981209718
