# Supplementary material for: A native prokaryotic voltage-dependent calcium channel with a novel selectivity filter sequence
Source: eLife. 2020 Feb 25;9:e52828. doi: 10.7554/eLife.52828 (PMC7041947; doi:10.7554/eLife.52828)
Supplement: Figure 8—source data 3. [file elife-52828-fig8-data3.csv]

	NavPp-D4G											NavPp-T6V
X	Px/PNa	1	2	3	4	5	6	7	8	9	10	Px/PNa	1	2	3	4	5	6	7	8	9	10
Ca		26.18371521	35.16928816	13.31755315	41.4346683	64.85648585	30.02543601	25.05527777	36.71325583	82.92840288	57.83185352		1.370343316	1.93662392	1.93662392	1.67170067	1.622781343	2.458975495	1.409250752	1.500107364	1.588365647	1.730994758
Sr		6.250978576	8.680153596	10.53301279	9.936621297								43.94210609	46.18998204	26.08771374	26.08771374	42.30620163	21.80096294	33.19716116	31.87501091
K		0.661598273	0.766609869	1.027584973									0.927167393	0.957856347	1.03752631	1.047191831
Cs		0.459240004	0.495842041	0.682839865	0.584910499								0.788674653	0.826302712	0.885035619	0.845001999
